# Supplementary material
Source: ML conference proceedings conference paper supplement (https://openreview.net/forum?id=xDxskDUvte)

FGSM Accuracy vs Epsilon (CIFAR-10)

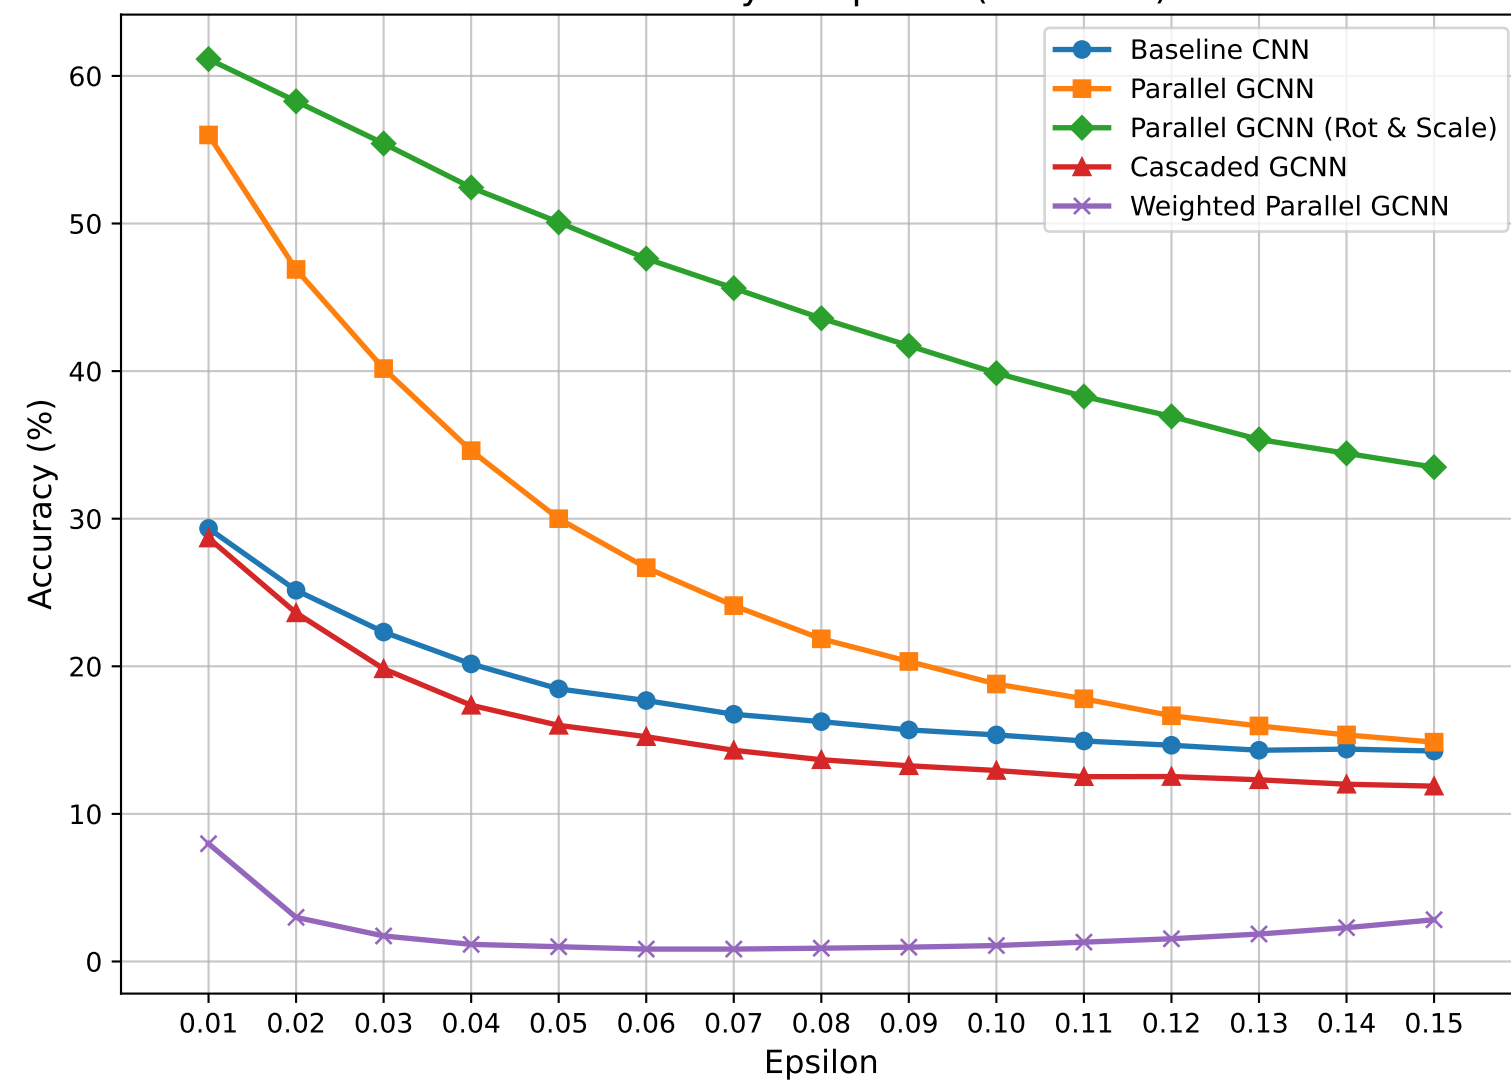

PGD Accuracy vs Epsilon (CIFAR-10)

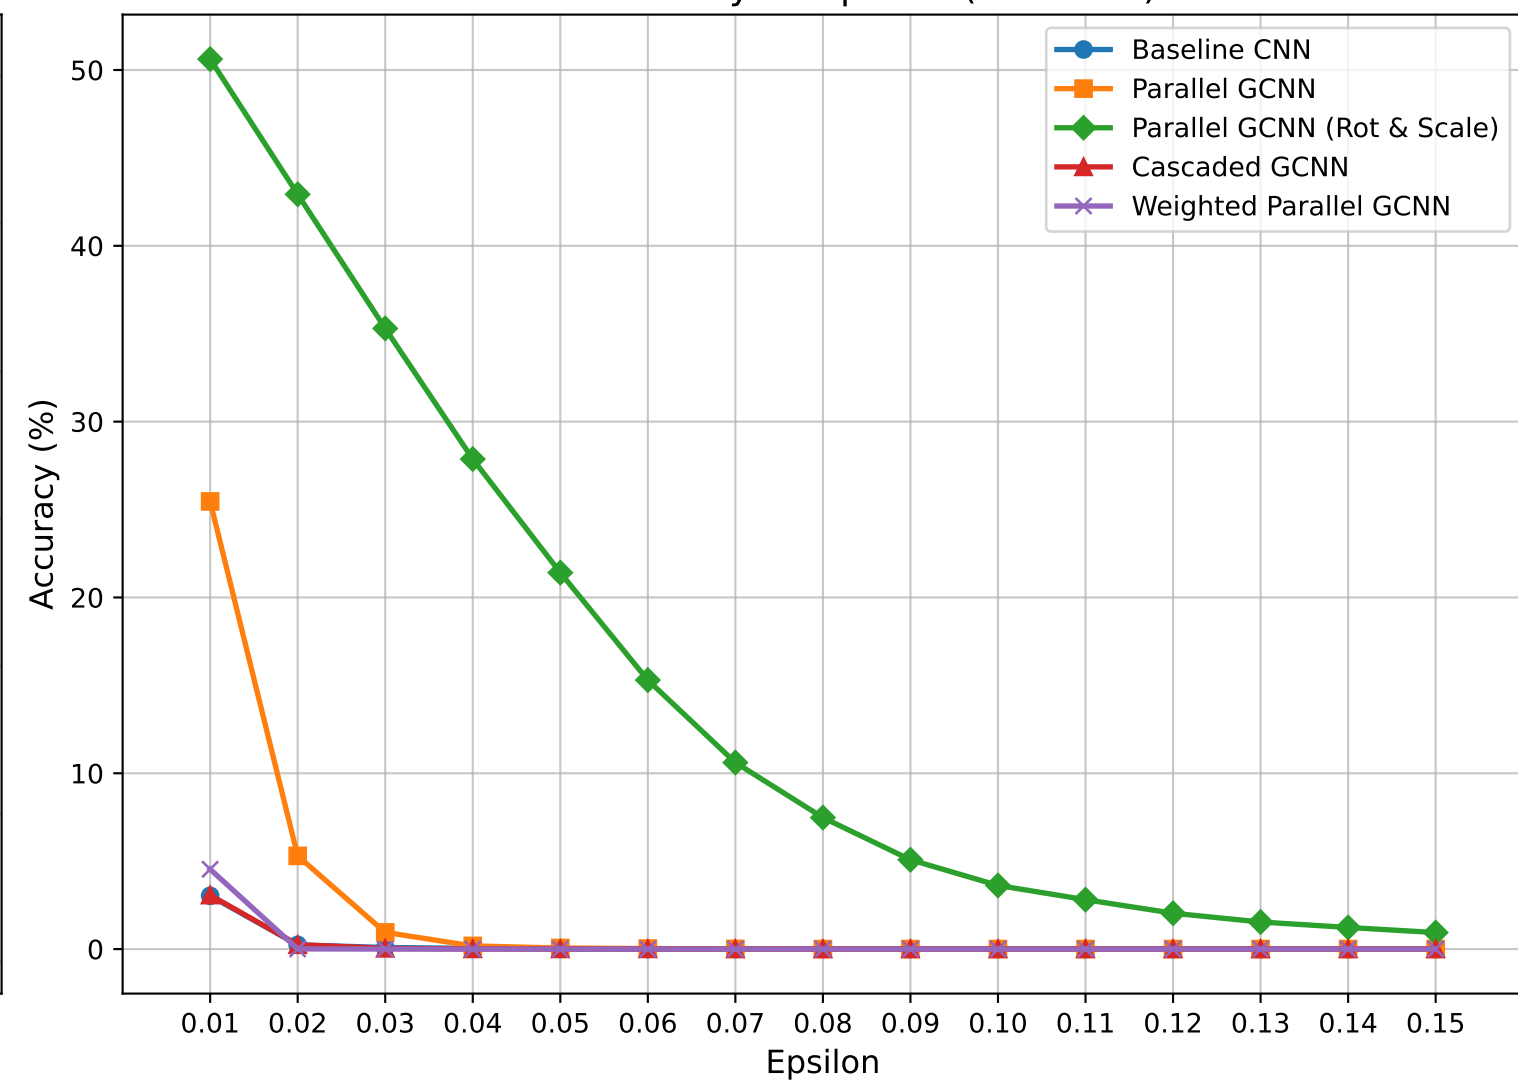

FGSM Accuracy vs Epsilon (CIFAR-100)

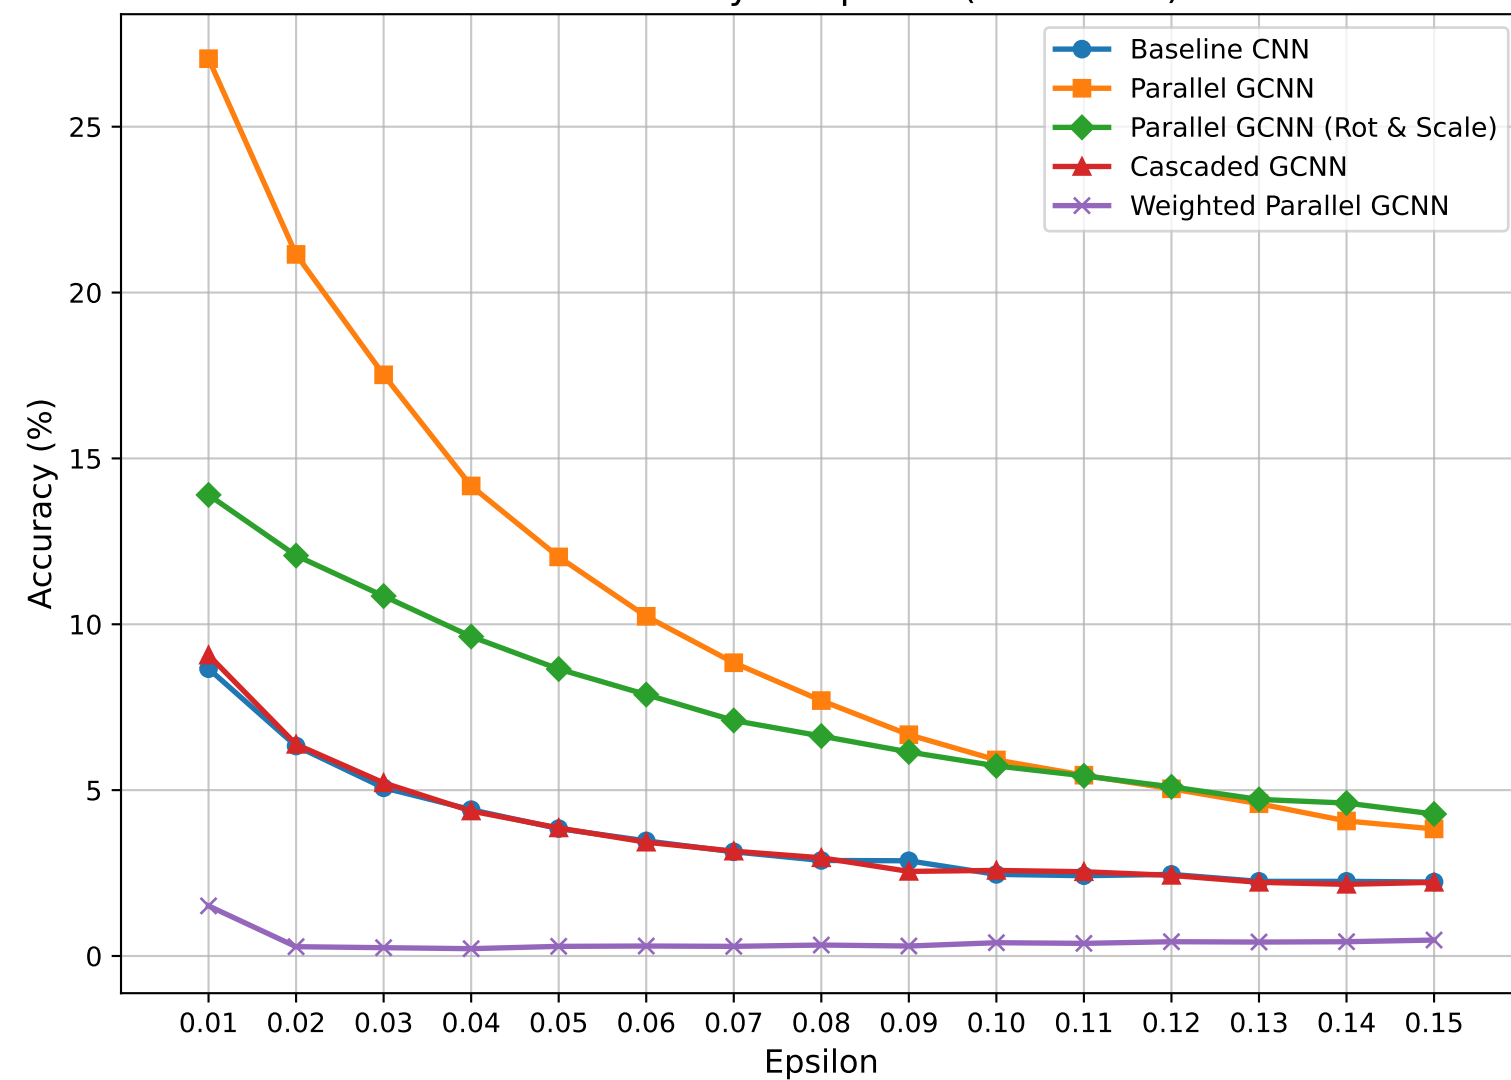

PGD Accuracy vs Epsilon (CIFAR-100)

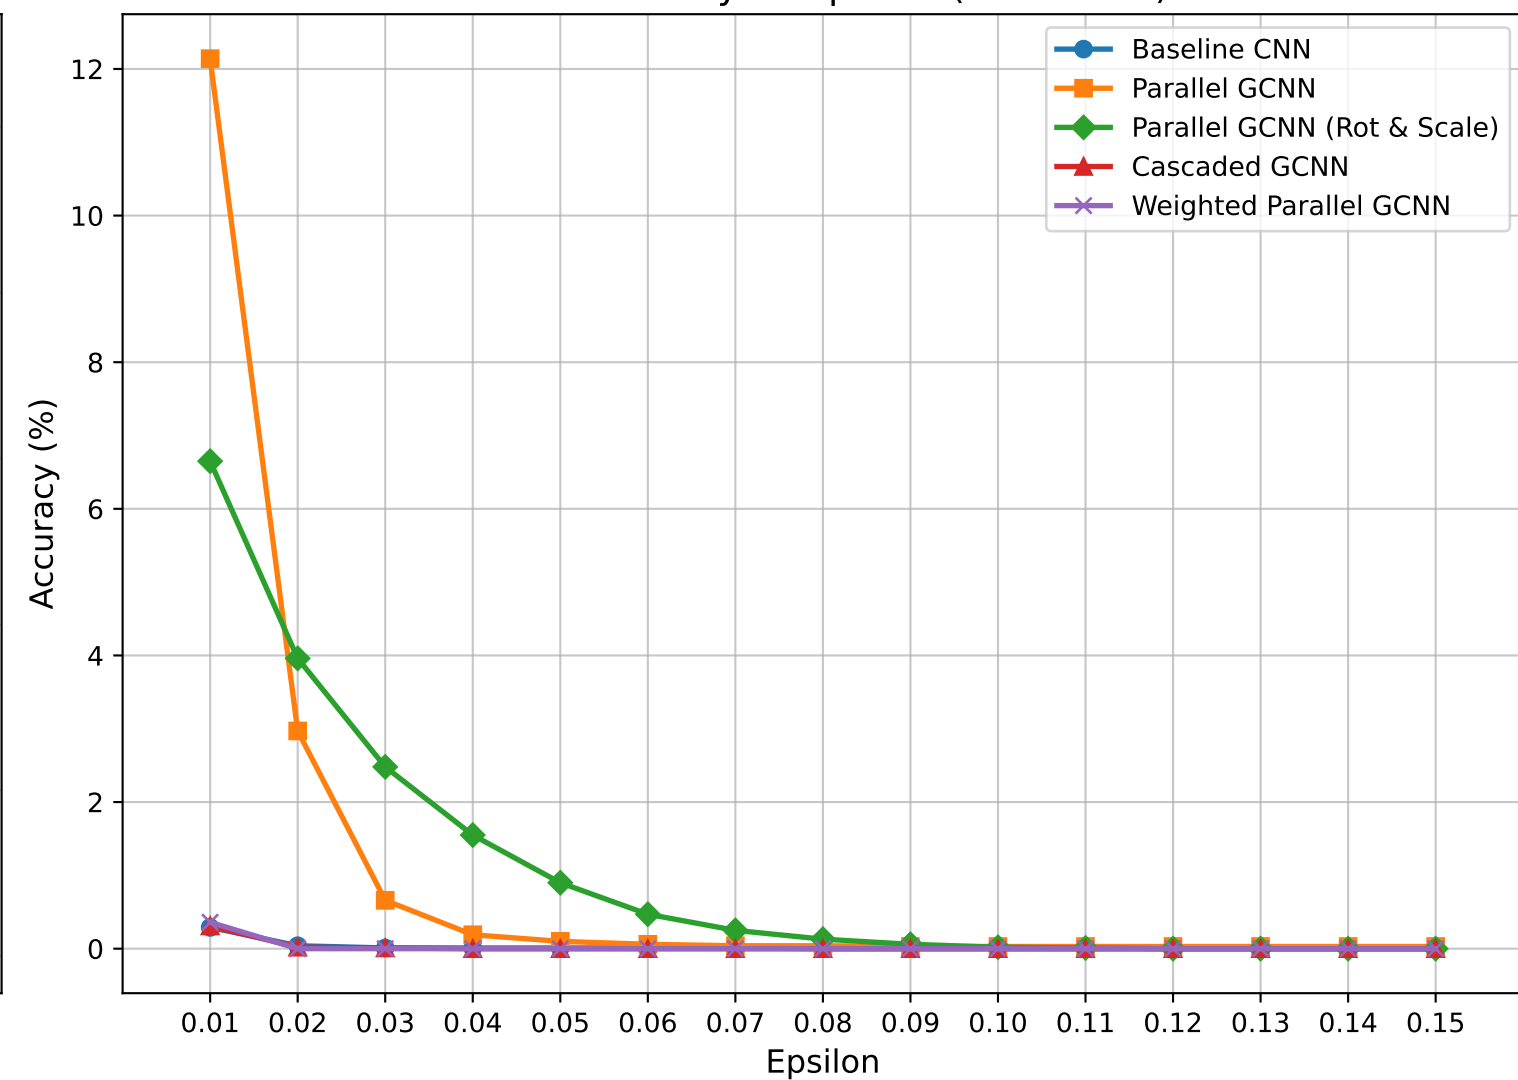

Supplement: supplementary_material [file cifar10_100_adversarial_accuracy_all_models_combined.pdf › 5models_codes/output/cifar10_100_adversarial_accuracy_all_models_combined.pdf]
