# Supplementary material
Source: ML conference proceedings conference paper supplement (https://openreview.net/forum?id=xDxskDUvte)

FGSM Accuracy for Various Models (10-layers) on CIFAR-100

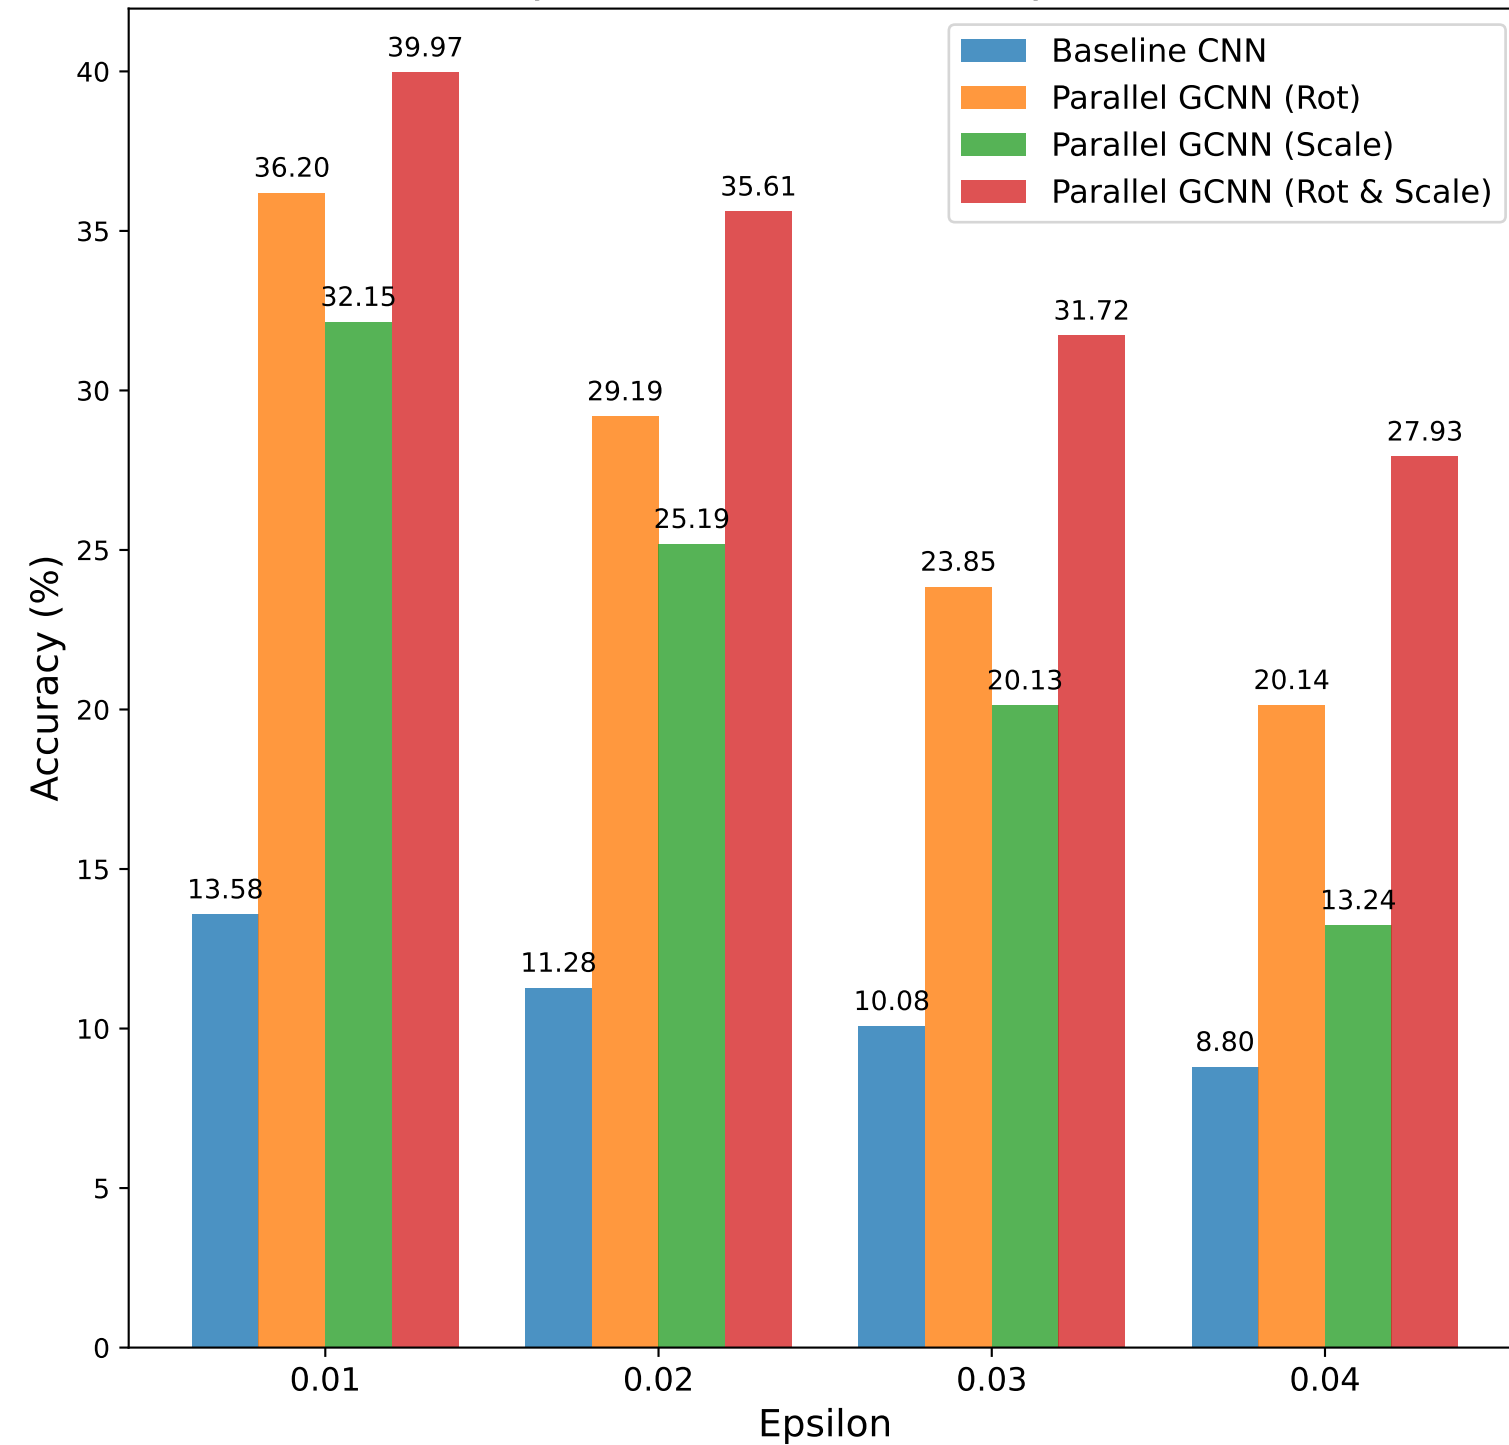

PGD Accuracy for Various Models (10-layers) on CIFAR-100

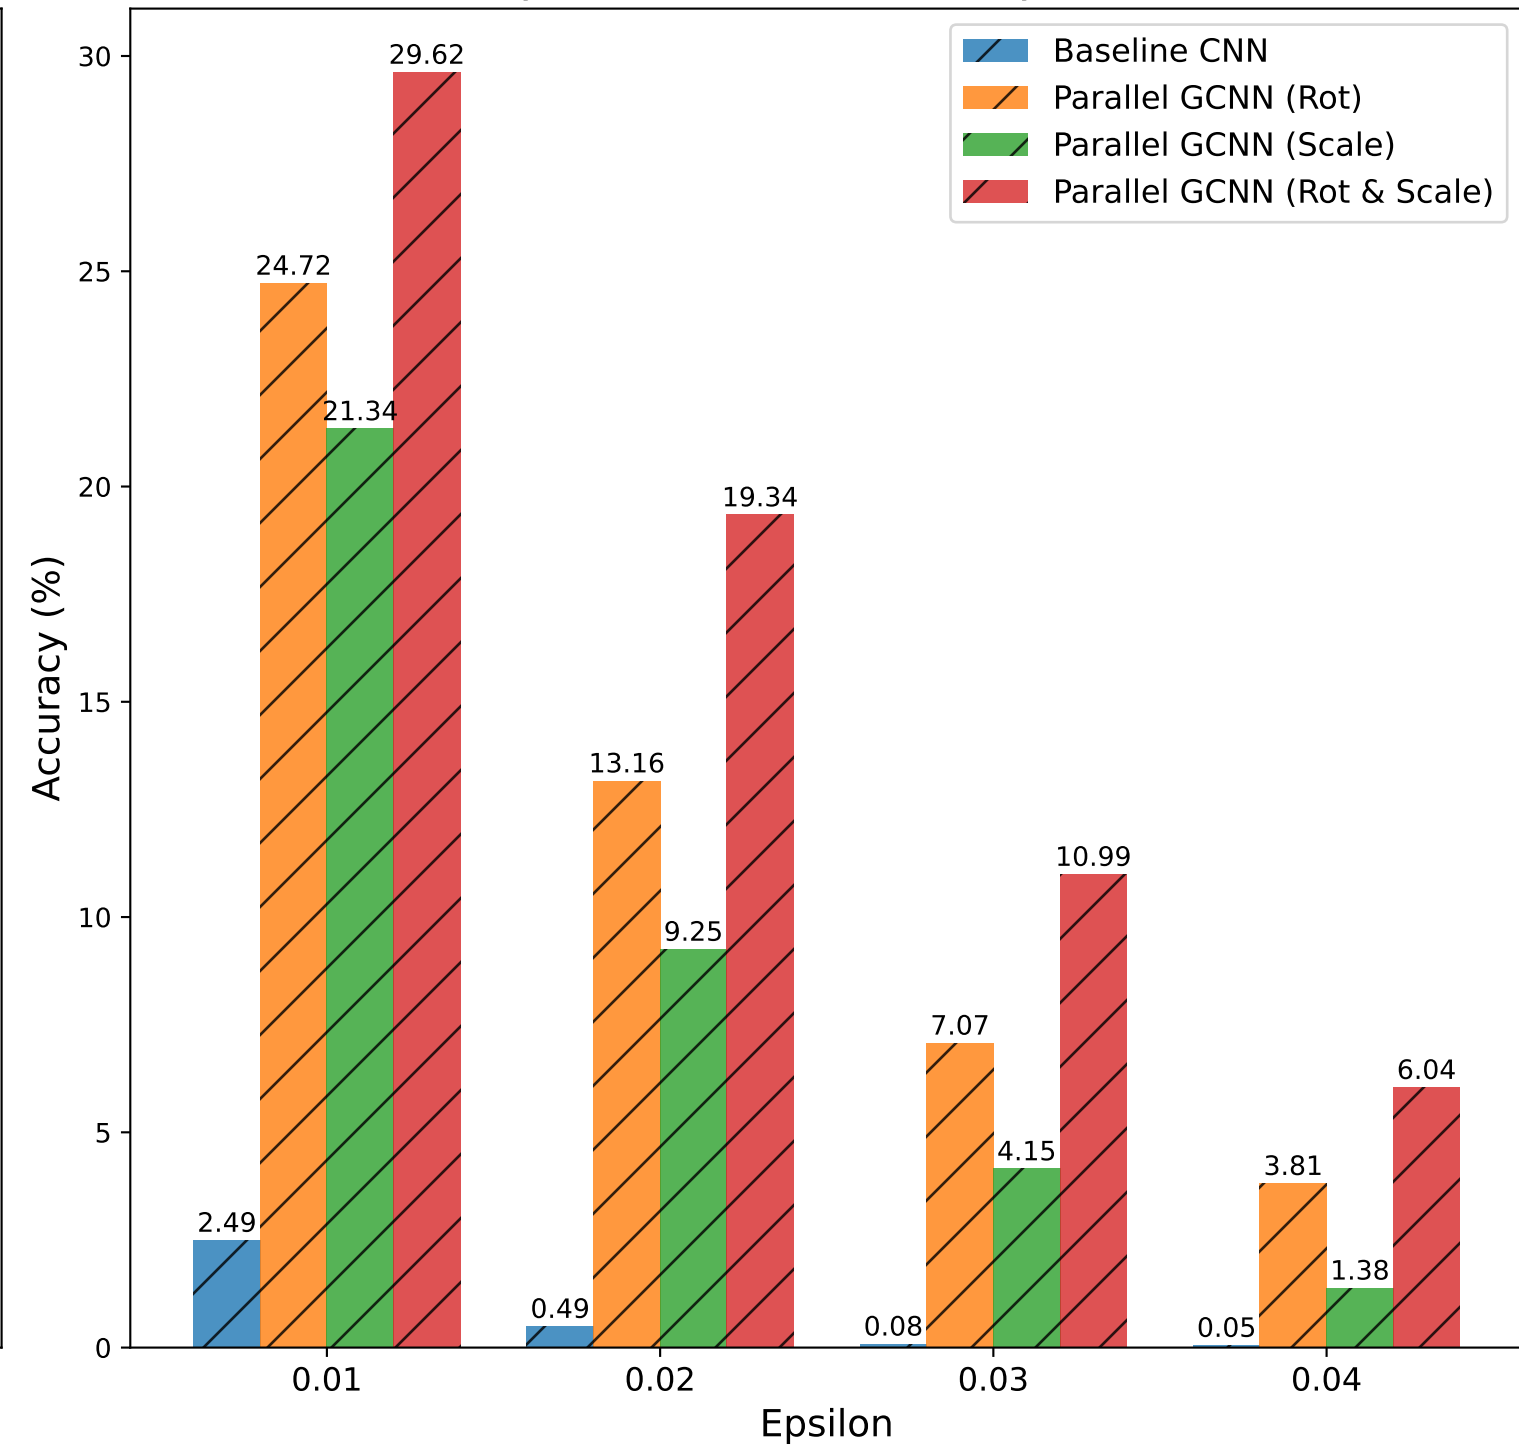

Supplement: supplementary_material [file cifar100_fgsm_pgd_accuracy_BaselineCNN_ParallelGCNN_RotScale_10_layers_bar_plot.pdf › 5models_codes/output/cifar100_fgsm_pgd_accuracy_BaselineCNN_ParallelGCNN_RotScale_10_layers_bar_plot.pdf]
