# Supplementary material
Source: ML conference proceedings conference paper supplement (https://openreview.net/forum?id=xDxskDUvte)

Original Image

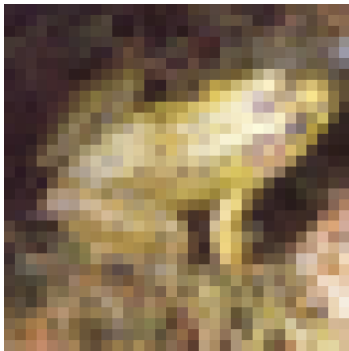

Standard CNN(0.16)

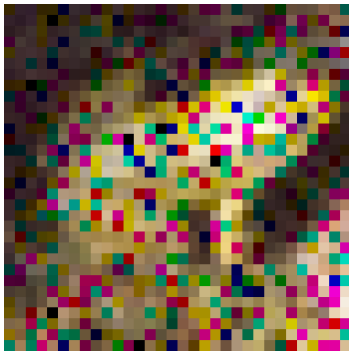

Group CNN(0.44)

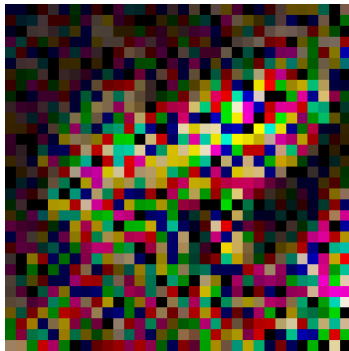

Supplement: supplementary_material [file Img19.pdf › 5models_codes/output/Img19.pdf]

Original Image

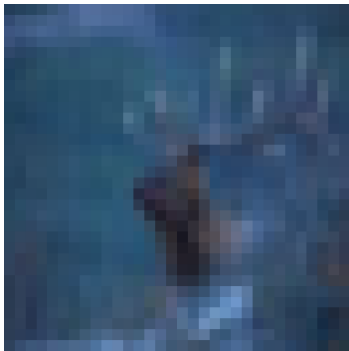

Standard CNN(0.05)

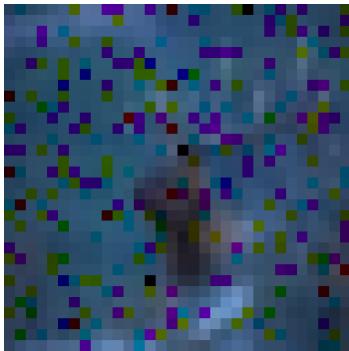

Group CNN(0.45)

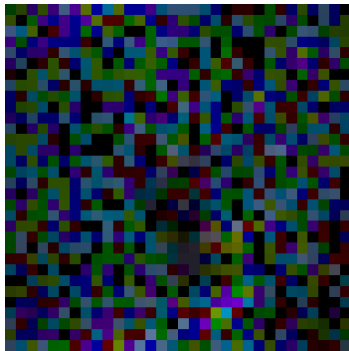

Supplement: supplementary_material [file Img22.pdf › 5models_codes/output/Img22.pdf]

Original Image

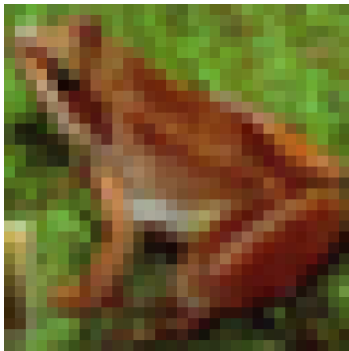

Standard CNN(0.1)

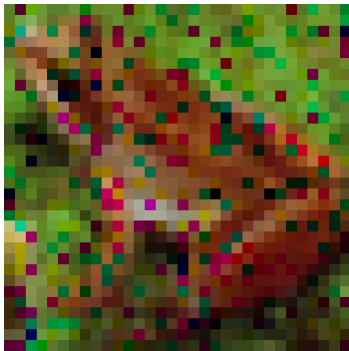

Group CNN(0.16)

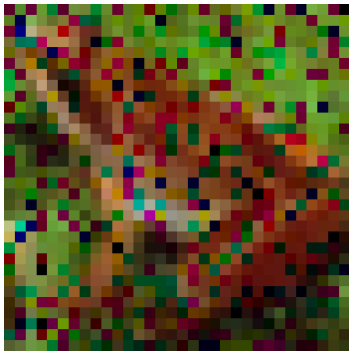

Supplement: supplementary_material [file Img29.pdf › 5models_codes/output/Img29.pdf]
